# Supplementary material
Source: PubMed Central journal article supplement (PMC2440666)
Supplement: NIHMS50569-supplement-01.pdf [file NIHMS50569-supplement-01.pdf]

Figure (S1)

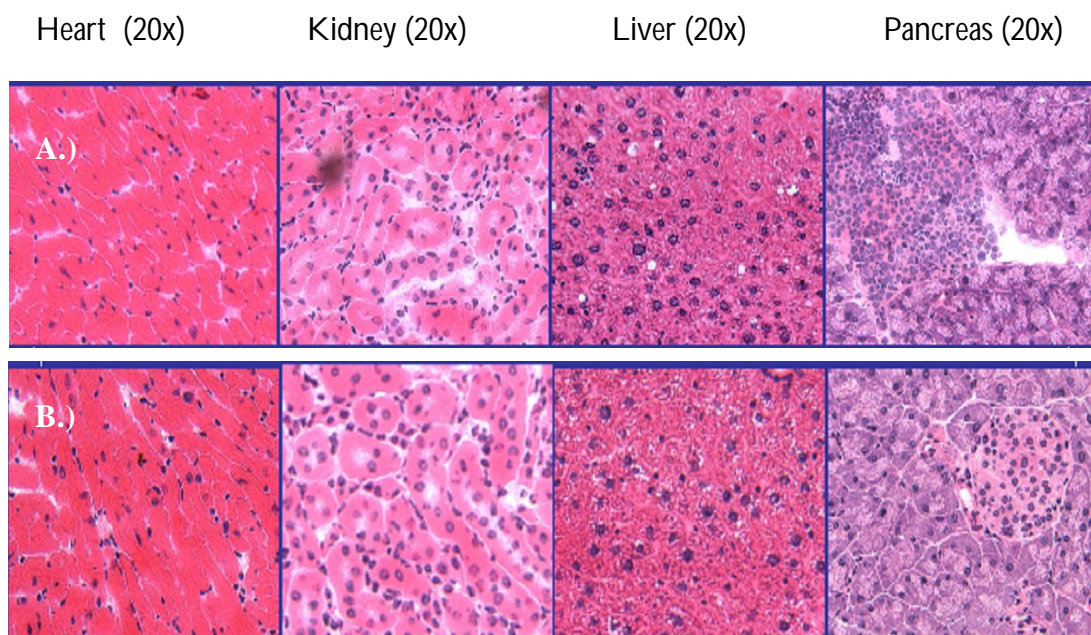

**Figure S1.** Islet specific infiltrate in DR4/164/Rag2<sup>0/0</sup> mice. H&E staining of Heart, Kidney, Liver, and Pancreas from DR4/164/Rag2<sup>0/0</sup> (A) and DR4/Rag2<sup>0/0</sup> mice (B)
